# Supplementary material for: Fully bio-based acetal diepoxy monomer with high modulus, good thermal stability and readily degradability
Source: Royal Society of Chemistry journal article supplement (doi:10.1039/d4py01038h), 2024-01-01
Supplement: d4py01038h1.pdf [file d4py01038h1.pdf]

## Supporting Information

# Fully Bio-Based Acetal Diepoxy Monomers: High Modulus, Good Thermal Stability and Readily Degradability

Zidie Song,<sup>a</sup> Li Liu,<sup>a</sup> Pengbo Zhang,<sup>b</sup> Kangle Xue,<sup>a</sup> Zibo Hua,<sup>a</sup> Tao You,<sup>a</sup> Yiqi Wu,<sup>a</sup> Hong Cui,<sup>c</sup> Zhen Hu<sup>a\*</sup> and Yudong Huang<sup>a\*</sup>

<sup>a</sup>School of Chemistry and Chemical Engineering, Harbin Institute of Technology,  
Harbin 150001, China

<sup>b</sup>Aerospace Institute of Advanced Material & Processing Technology, Beijing 100071,  
China

<sup>c</sup>Beijing Spacecrafts Manufacturing Co, Ltd., Beijing 100094, China

## Contents

|                 |   |
|-----------------|---|
| Figure S1 ..... | 3 |
| Figure S2 ..... | 3 |
| Figure S3 ..... | 4 |
| Figure S4 ..... | 4 |
| Table S1 .....  | 5 |

# 1. Analysis of NMR spectra of synthetic substances

## 1.1 NMR spectra of VX

$^1\text{H}$ -NMR of VX (400 MHz, DMSO- $d_6$ )  $\delta$ =9.04 (s, 1H), 7.00 (s, 1H), 6.97 (s, 1H), 6.90 (d, J=5.4Hz, 1H), 6.87 (d, J=5.4Hz, 1H), 6.77 (d, 1H), 6.75 (d, 1H), 5.56 (s, 1H), 5.51 (s, 1H), 4.76 (t, 1H), 4.09(m, 2H), 3.97(m, 1H) 3.94(t, 1H), 3.84(s, 3H), 3.67-3.58 (m, 1H), 3.58-3.49 (m, 1H).

$^{13}\text{C}$ -NMR of VX (101 MHz, DMSO- $d_6$ )  $\delta$ =147.05, 147.03, 146.87, 146.78, 129.94, 129.77, 119.16, 118.83, 114.84, 110.64, 110.23, 99.73, 99.43, 78.85, 69.65, 69.14, 68.95, 59.52, 55.61, 55.51.

## 1.2 NMR spectra of DGEVX

$^1\text{H}$ -NMR of DGEVX (400 MHz,  $\text{CDCl}_3$ )  $\delta$ =7.19-7.00 (m, 2H), 7.00-6.85 (m, 1H), 5.61 (s, 1H), 5.54 (s, 1H), 4.39 (d, J=8Hz, 1H), 4.28-4.19 (m, 2H), 4.16 (d, J=2.0 Hz, 1H), 4.12 (dd, J =13.7, 11.5 Hz, 1H), 4.05-3.99 (m, 1H), 3.97 (s, 1H), 3.90 (s, 3H), 3.88 (s, 3H), 3.85 (m, 1H), 3.82 (s, 1H), 3.37(s, 2H), 2.89 (t, J=3.8Hz, 2H), 2.76 (dd, J=6.4, 2.6Hz, 2H), 2.00 (dd, J =3.6, 3.2Hz, 1H) .

$^{13}\text{C}$ -NMR of DGEVX (101 MHz,  $\text{CDCl}_3$ )  $\delta$ =149.54, 149.47, 148.76, 148.66, 131.85, 131.68, 119.28, 118.95, 113.88, 113.70, 110.44, 110.15, 100.92, 100.54, 78.84, 72.08, 70.33, 70.32, 70.20, 69.96, 62.03, 55.98, 50.14, 44.97.

## 2. Experimental data images

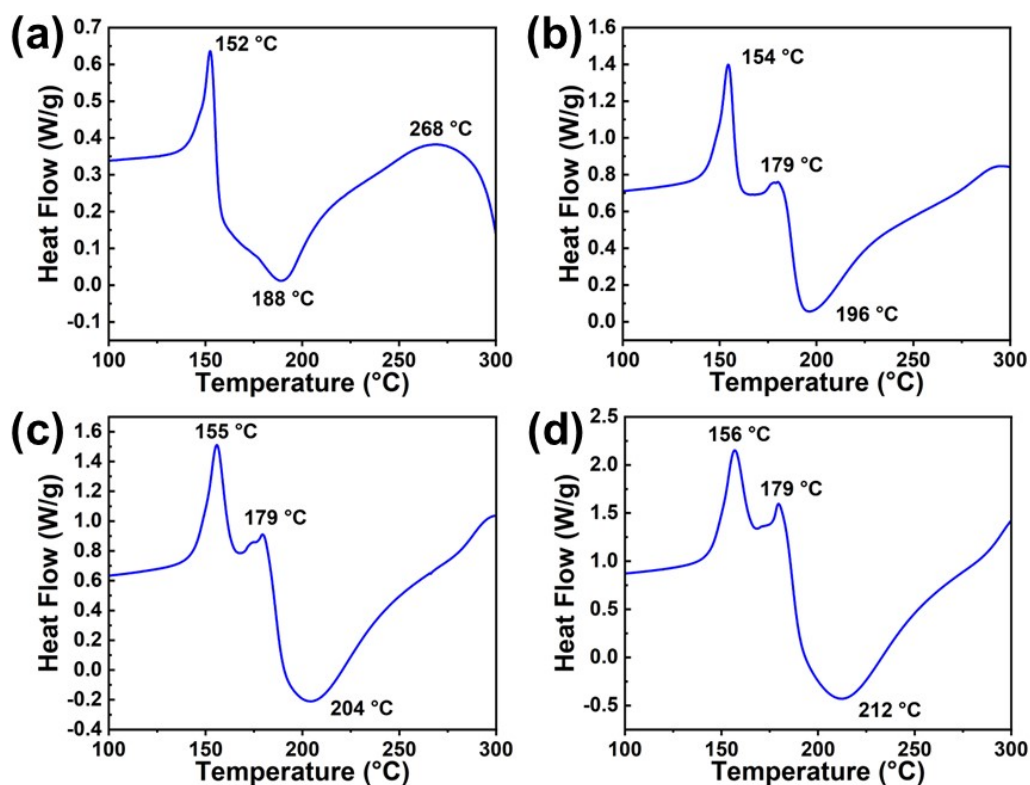

Fig. S1 DSC curves of DGEVX-DDS before curing (a)5 °C/min, (b)10 °C/min, (c)15 °C/min, (d)20 °C/min.

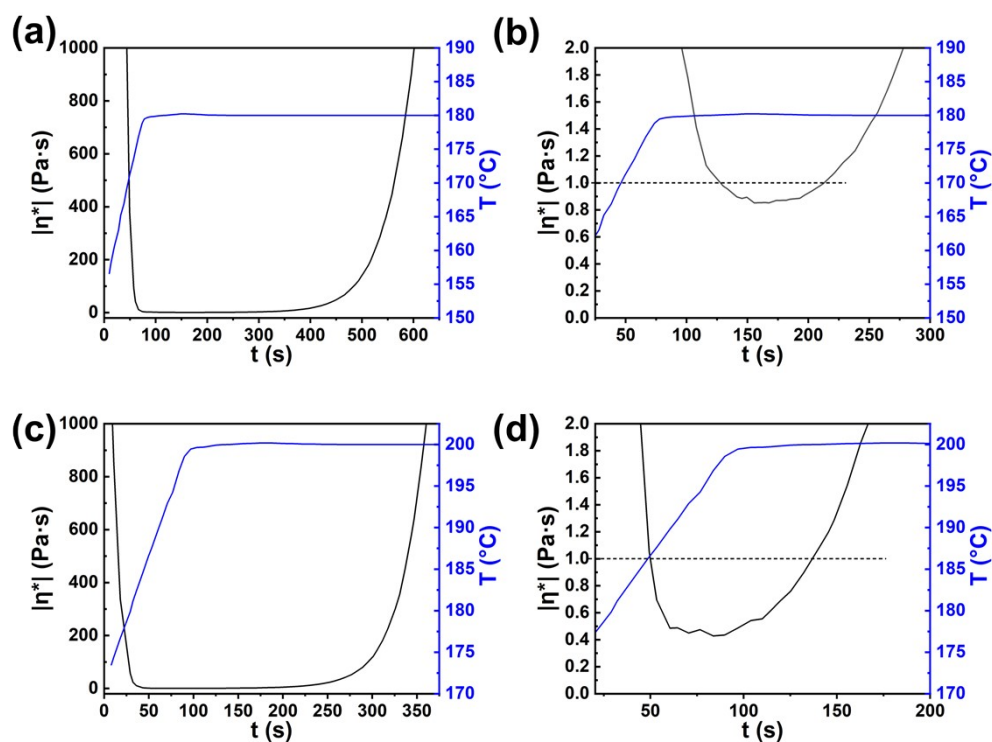

Fig. S2 Viscosity-temperature-time curves of DGEVX-DDS(a)180 °C (b)0-300 s of 180 °C (c)200 °C (d)0-200 s of 200 °C

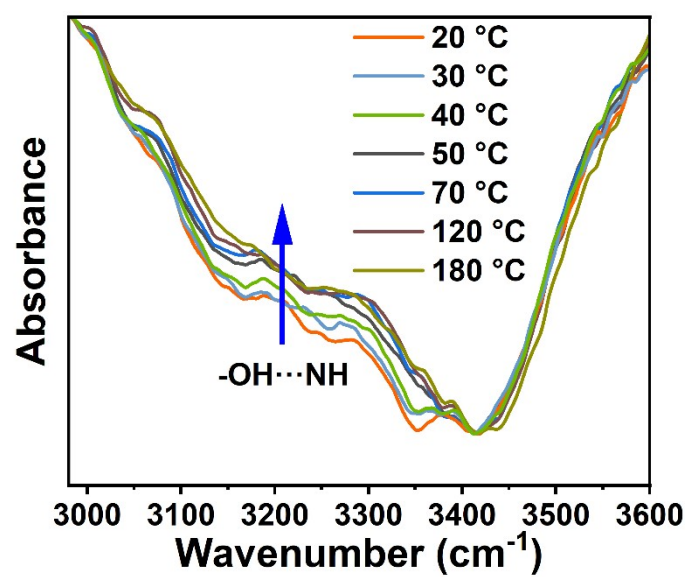

Fig. S3 In situ FT-IR spectroscopy of DGEVX-DDS cross-linked network.

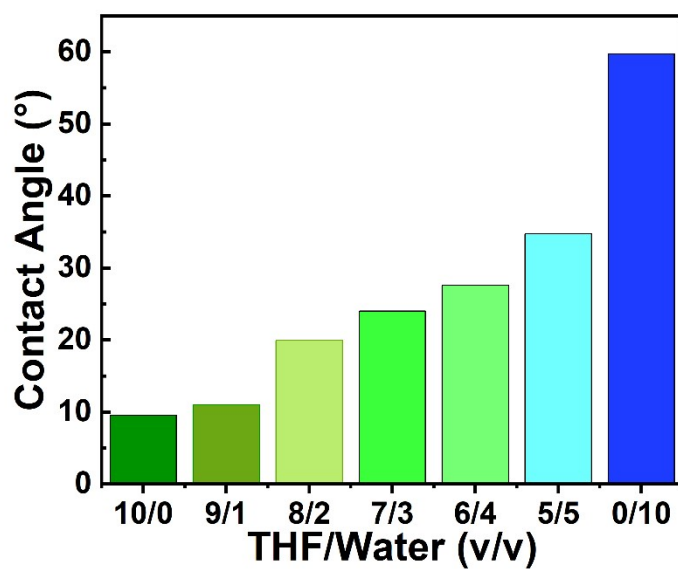

Fig. S4 Contact angle between cross-linked network structure and organic solutions.

Tab. S1 Comparisons of the properties and temperature curing procedures of bio-massed degradable epoxy systems reported in the literature and this work.

| Composition      | T <sub>d5</sub> (°C) | T <sub>g</sub> (°C) | Tensile strength (MPa) | Tensile modulus (GPa) | Reference        |
|------------------|----------------------|---------------------|------------------------|-----------------------|------------------|
| <b>DGEVX/DDS</b> | <b>315</b>           | <b>240</b>          | <b>82.00</b>           | <b>4.06</b>           | <b>This work</b> |
| DGEVE/DDS        | 290                  | 184                 | 63.3-79.3              | 3.35                  | 1                |
| DGEVP/IPDA       | 278                  | 169                 | 78-92                  | 3.13                  | 2, 3             |
| DGHMDO/DDM       | 330                  | 164                 | 104.00                 | 2.16                  | 4                |
| SAE-E            | <300                 | 72                  | 15.00                  | 0.45                  | 5                |
| AEp-2            | 292                  | 147                 | 67.40                  | 1.88                  | 6                |
| ACA-III          | 303                  | 62                  | 48.00                  | 1.47                  | 7                |
| ACE-III          | 309                  | 189                 | 66.00                  | 1.72                  | 8                |
| BOB-DDS-2        | <300                 | 168.4               | 88.8                   | 2.15                  | 9                |
| TDE-85/DTDA      | 282                  | 212                 | 70.7                   | 1.61                  | 10               |
| TDS-V5           | -                    | 163                 | -                      | 2.78                  | 11               |
| DPG-0.3          | 322                  | 165                 | 78                     | 3.9                   | 12               |
| LAE-GLU          | <300                 | 133                 | 93.5                   | 2.16                  | 13               |

### 3. References

1. W. Yuan, S. Ma, S. Wang, Q. Li, B. Wang, X. Xu, K. Huang, J. Chen, S. You and J. Zhu, *European Polymer Journal*, 2019, **117**, 200-207.
2. S. Ma, J. Wei, Z. Jia, T. Yu, W. Yuan, Q. Li, S. Wang, S. You, R. Liu and J. Zhu, *Journal of Materials Chemistry A*, 2019, **7**, 1233-1243.
3. C. Yan, J. Wei, Y. Zhu, H. Xu, D. Liu, G. Chen, X. Liu, J. Dai and D. Lv, *Polymer Composites*, 2023, **44**, 4081-4094.
4. B. Wang, S. Ma, Q. Li, H. Zhang, J. Liu, R. Wang, Z. Chen, X. Xu, S. Wang, N. Lu, Y. Liu, S. Yan and J. Zhu, *Green Chemistry*, 2020, **22**, 1275-1290.
5. W. Zhang, F. Gao, X. Chen, L. Shen, Y. Chen and Y. Lin, *ACS Sustainable Chemistry & Engineering*, 2023, **11**, 3065-3073.
6. P. Li, S. Ma, B. Wang, X. Xu, H. Feng, Z. Yu, T. Yu, Y. Liu and J. Zhu, *Composites Science and Technology*, 2022, **219**.
7. I. Toendepi, S. Zhu, Y. Liu, L. Zhang, Y. Wei and W. Liu, *Polymer*, 2023, **272**.
8. I. Toendepi, S. Zhu, Y. Liu, L. Zhang, Y. Wei and W. Liu, *Polymer*, 2024, **290**.
9. X. Zhang, S. Cai, Z. Jian, X. Yang, Y. Wang, Z. Wang, X. Lu and H. Xia, *Industrial & Engineering Chemistry Research*, 2023, **62**, 18473-18483.
10. H. Gong, J. Wu, Z. Zhao, Z. Guo, L. Gao, B. Zhang, M.-H. Li and J. Hu, *Chemical Engineering Journal*, 2022, **446**.
11. X. Jiao, Y. Ma, Z. Zhao, L. Gao, B. Zhang, J. Yang, M.-H. Li and J. Hu, *Advanced Functional Materials*, 2024, DOI: 10.1002/adfm.202409223.
12. B. Zhang, T. Cui, X. Jiao, Y. Ma, L. Gao and J. Hu, *Chemical Engineering Journal*, 2023, **476**.
13. Y. Liu, Z. Yu, B. Wang, X. Xu, H. Feng, P. Li, J. Zhu and S. Ma, *Acs Sustainable Chemistry & Engineering*, 2022, **10**, 10898-10907.
